# Supplementary material for: Endopolyploidy Variation in Wild Barley Seeds across Environmental Gradients in Israel
Source: MDPI journal article supplement (doi:10.3390/genes12050711), 2021-05-10
Supplement: s1 [file s1]

Supplementary Materials

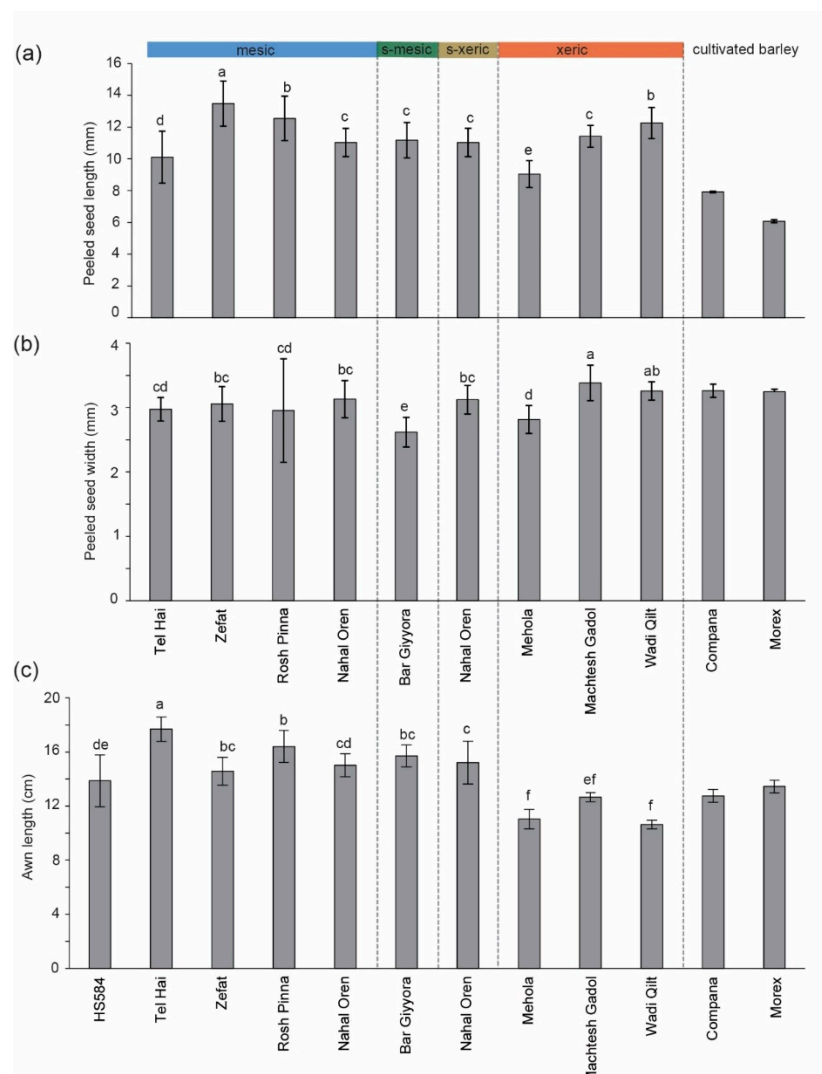

**Figure S1.** Phenotypic analysis of dry seeds of wild barley accessions originating from Israel. **Supports Figure 2.** (a) and (b) Quantitative data for peeled seed length and seed width. (c) Quantitative data for awn length. The ecological conditions for the sampling site of HS584 are unknown. s-mesic = semi-mesic, s-xeric = semi-xeric. Compana and Morex represent two- and six-rowed cultivated barley controls, respectively. Data are the means ( $\pm$ SD) from three biological repetitions, each with at least 20 seeds. One-way analysis of variance (ANOVA) was made separately for each tested parameter. Values marked with the same letter do not differ according to Duncan multiple range test ( $p \leq 0.05$ ).

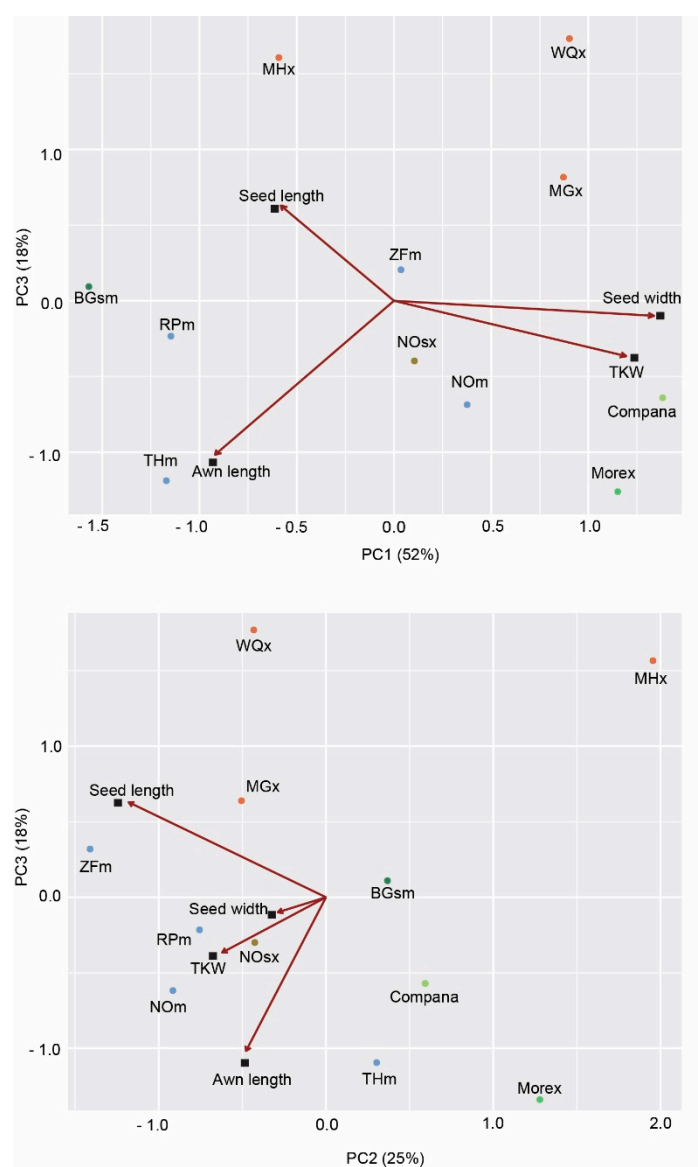

**Figure S2.** Principal component (PC) analysis of TKW, seed length and width for peeled seeds, and awn length. **Supports Figure 2.** The positions represent contribution rates of three PCs.

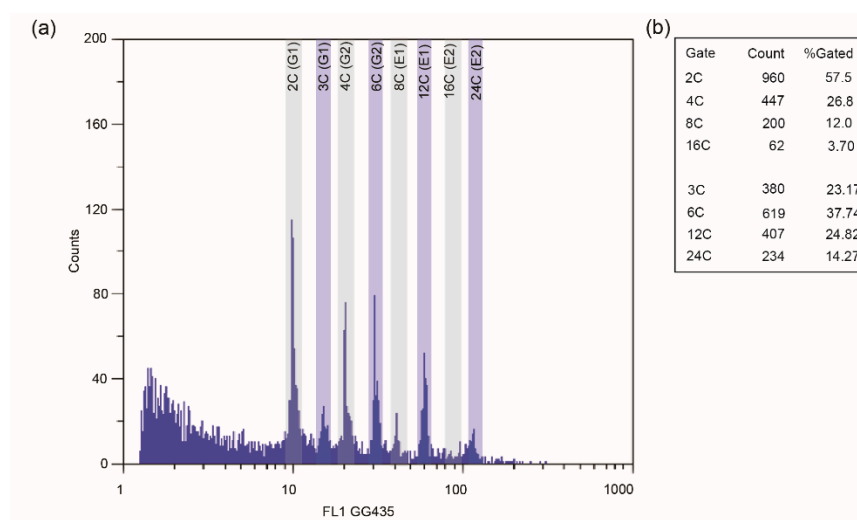

**Figure S3.** An example showing the interpretation of histograms of nuclear DNA content. **Supports Figures 3 and 4.** (a) Representative gated histogram obtained from 20 DAP whole peeled wild barley seed accession HS584. Histogram shows the gated C-value peaks for diploid seed tissue (a mixture of an embryo and seed maternal tissues; 2C = G1, 4C = G2, 8C = E1 = first endocycle, and 16C = E2 = second endocycle) and triploid endosperm tissues (3C = G1, 6C = G2, 12C = E1 = first endocycle, and 24C = E2 = second endocycle) marked as gray and blue colored shading, respectively. The x-axis shows relative fluorescence intensity on log3 scale and y-axis number of measured particles (counts). The gates were created in FloMax program (Sysmex-Partec). The same gates were used for all evaluated samples of this study. (b) Table shows the number of particles per each gate collected from the histogram presented in (a).

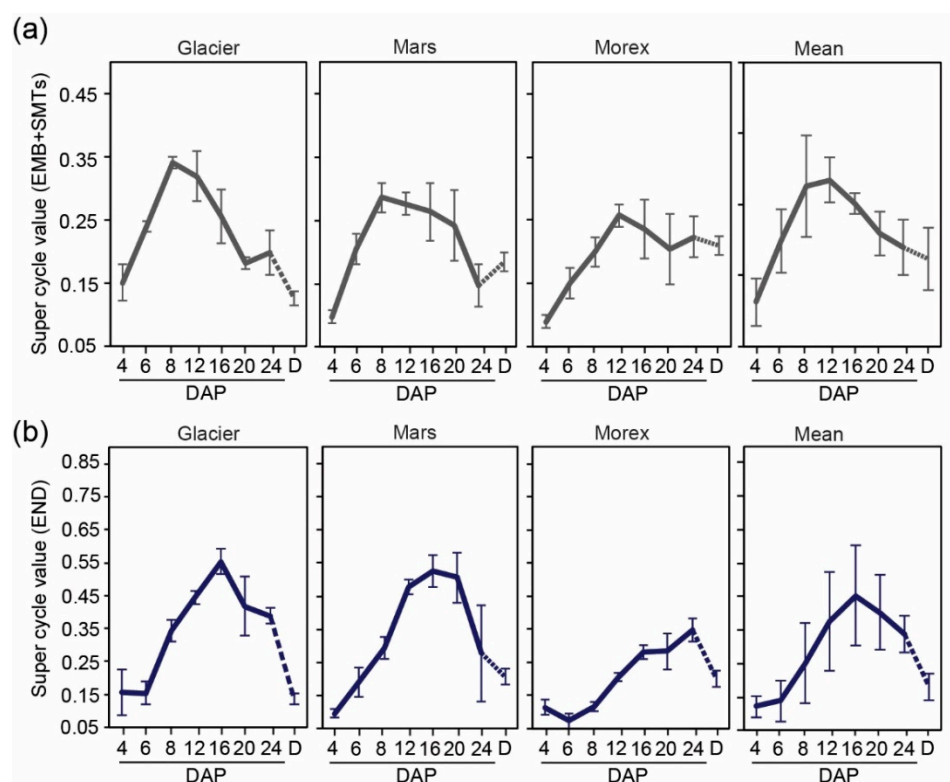

**Figure S4.** Comparison of super cycle values in seed tissues of three six-rowed barley cultivars. **Source data for Figure 4.** (a) and (b) show data for embryo/seed maternal tissues (EMB + SMTs) versus endosperm (END), respectively. Data are the means ( $\pm$ SD) from three biological replicates, each with at least five individual measurements. Mean = mean of super cycle value calculated between all cultivars. The dash-line between 24 DAP and dry seed samples means that seed development continued after 24 DAP.

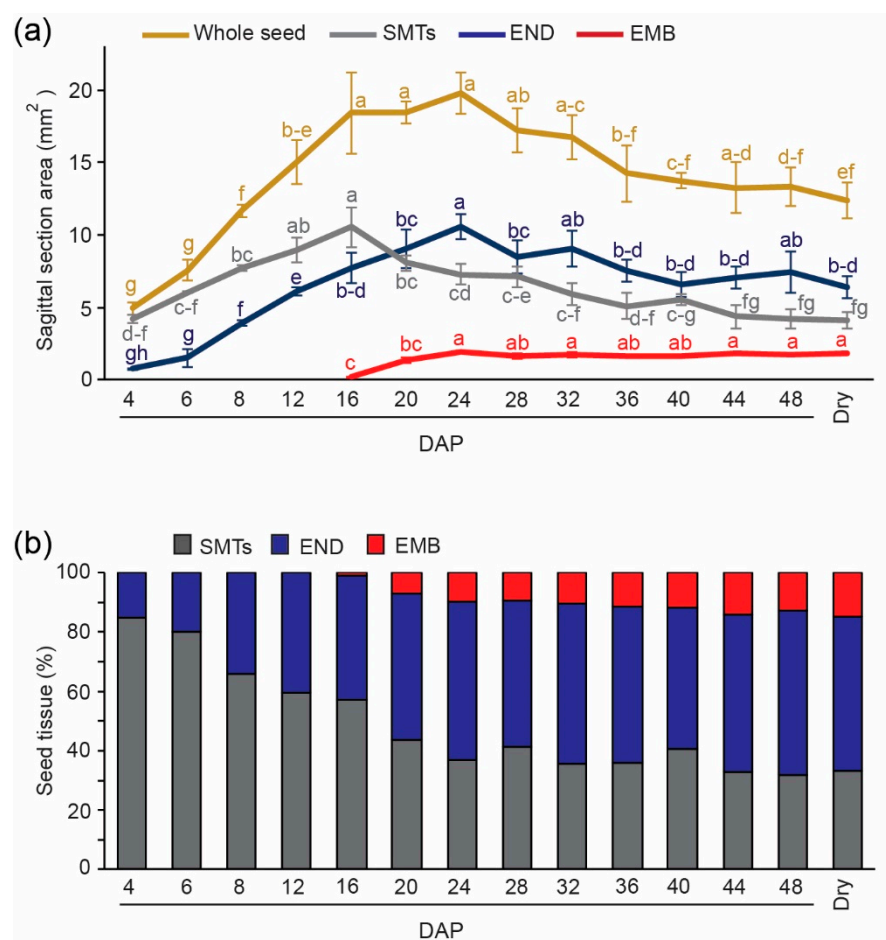

**Figure S5.** Time-course study of wild barley HS584 seed growth. **Supports Figure 6a.** (a) Measurements of sagittal section area of the whole seed, seed maternal tissues (SMTs), endosperm (END) and embryo (EMB) from 4 to 48 days after pollination (DAP) and in dry seed. Four to twelve DAP embryos were not analyzed for technical reasons. Data are the means from  $\geq 20$  individual measurements. ANOVA was made separately for each parameter. Values marked with the same letter do not differ according to Tukey's test ( $p \leq 0.05$ ). (b) Cumulative percentage of major seed tissues calculated based on (a).

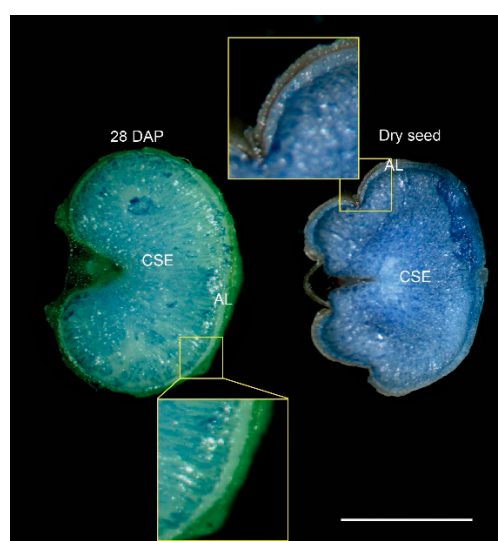

**Figure S6.** Analysis the aleurone layer viability. **Supports Figure 6b.** Selected transverse sections of 28 DAP and dry wild barley HS584 seeds stained with 0.1% Evans blue. AL = Aleurone layer, CSE = central starchy endosperm. Scale bar = 5 mm.

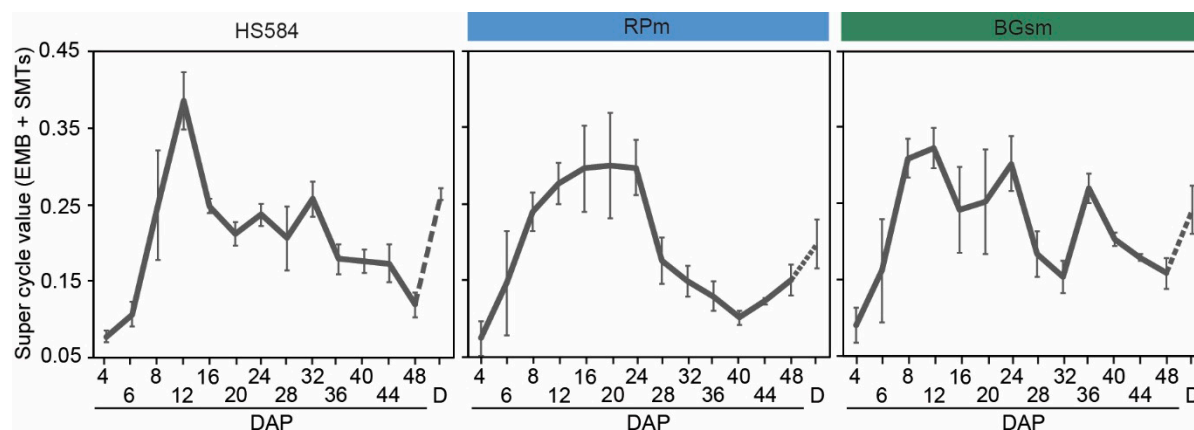

**Figure S7.** Comparison of super cycle values in diploid seed tissues (embryo + seed maternal tissues; EMB+SMTs) of three selected wild barley accessions at given DAP. D = Dry, Rpm = Rosh Pinna, BGx = Bar Giyyora. **Complements Figure 6c.** Data are the means ( $\pm$ SD) from three biological replicates, each with at least five individual measurements. The dash-line between 48 DAP and dry seed samples means that seed desiccation continued after 48 DAP.

**Tables S1.** Percentage of 2C, 4C, 8C and 16C nuclei at a given DAP and in dry seeds in diploid seed tissues represented by the embryo (EMB) and seed maternal tissues (SMTs). **Supports Figure 3a.** Values are the means from 3 biological replicates, each with at least 5 measurements (seeds)  $\pm$  SD. Blue color = mesic; green color = semi-mesic; green-brown color = semi-xeric; orange color = xeric.

#### 4 DAP

|     | HS584           | THm             | ZFm             | RPm             | NOm             | BGsm            | NOsx            | MHx             | MGx             | WQx             |
|-----|-----------------|-----------------|-----------------|-----------------|-----------------|-----------------|-----------------|-----------------|-----------------|-----------------|
| 2C  | 42.9 $\pm$ 2.98 | 42.1 $\pm$ 1.85 | 48.7 $\pm$ 0.16 | 45 $\pm$ 2.4    | 48.2 $\pm$ 0.72 | 43.6 $\pm$ 2.86 | 47.5 $\pm$ 1.8  | 45.8 $\pm$ 0.79 | 51.5 $\pm$ 0.23 | 49.4 $\pm$ 0.54 |
| 4C  | 47.3 $\pm$ 1.7  | 49.6 $\pm$ 1.44 | 44.1 $\pm$ 1.03 | 48.3 $\pm$ 0.92 | 44.5 $\pm$ 1.01 | 48 $\pm$ 2.09   | 45.2 $\pm$ 1.11 | 48.6 $\pm$ 0.49 | 42.7 $\pm$ 0.53 | 45.4 $\pm$ 0.26 |
| 8C  | 9 $\pm$ 1.39    | 7.6 $\pm$ 1.3   | 6.7 $\pm$ 0.92  | 5.9 $\pm$ 1.85  | 6.6 $\pm$ 0.81  | 7.7 $\pm$ 0.89  | 6.5 $\pm$ 0.63  | 4.9 $\pm$ 1.11  | 5.2 $\pm$ 0.26  | 4.7 $\pm$ 0.29  |
| 16C | 0.9 $\pm$ 0.13  | 0.6 $\pm$ 0.04  | 0.5 $\pm$ 0.05  | 0.8 $\pm$ 0.24  | 0.7 $\pm$ 0.03  | 0.7 $\pm$ 0.09  | 0.8 $\pm$ 0.12  | 0.7 $\pm$ 0.08  | 0.7 $\pm$ 0.09  | 0.5 $\pm$ 0.01  |

#### 6 DAP

|     | HS584           | THm             | ZFm             | RPm             | NOm             | BGsm            | NOsx            | MHx             | MGx             | WQx             |
|-----|-----------------|-----------------|-----------------|-----------------|-----------------|-----------------|-----------------|-----------------|-----------------|-----------------|
| 2C  | 33.1 $\pm$ 4.83 | 39 $\pm$ 2.92   | 44.6 $\pm$ 3.1  | 38.6 $\pm$ 2.86 | 41.8 $\pm$ 3.17 | 35.9 $\pm$ 1.62 | 42.7 $\pm$ 1.86 | 42.1 $\pm$ 1.12 | 49.3 $\pm$ 2.18 | 44.4 $\pm$ 0.24 |
| 4C  | 45.6 $\pm$ 0.82 | 48.9 $\pm$ 1.89 | 44.3 $\pm$ 1.06 | 48.7 $\pm$ 2.07 | 43.7 $\pm$ 1.84 | 49.3 $\pm$ 1.02 | 47.2 $\pm$ 1.35 | 48.9 $\pm$ 0.42 | 42.4 $\pm$ 1.47 | 45.8 $\pm$ 0.87 |
| 8C  | 17.6 $\pm$ 2.47 | 11 $\pm$ 1.35   | 10.3 $\pm$ 2.57 | 10.7 $\pm$ 3.04 | 12.1 $\pm$ 2.9  | 13.2 $\pm$ 0.6  | 9.2 $\pm$ 1.35  | 8 $\pm$ 0.7     | 7.8 $\pm$ 1.02  | 8.5 $\pm$ 0.5   |
| 16C | 3.7 $\pm$ 2.37  | 1.1 $\pm$ 0.25  | 0.8 $\pm$ 0.07  | 2 $\pm$ 1.89    | 2.4 $\pm$ 2.17  | 1.5 $\pm$ 0.26  | 0.9 $\pm$ 0.09  | 1 $\pm$ 0.19    | 0.5 $\pm$ 0.11  | 1.4 $\pm$ 0.48  |

#### 8 DAP

|     | HS584           | THm             | ZFm             | RPm             | NOm             | BGsm            | NOsx            | MHx             | MGx             | WQx             |
|-----|-----------------|-----------------|-----------------|-----------------|-----------------|-----------------|-----------------|-----------------|-----------------|-----------------|
| 2C  | 30.1 $\pm$ 2.49 | 35.9 $\pm$ 2.82 | 37 $\pm$ 3.64   | 33.6 $\pm$ 2.08 | 42.6 $\pm$ 0.58 | 33.8 $\pm$ 1.01 | 37.7 $\pm$ 1.62 | 40 $\pm$ 2.03   | 35.9 $\pm$ 0.97 | 42.8 $\pm$ 2.31 |
| 4C  | 40.3 $\pm$ 4.1  | 47.8 $\pm$ 0.13 | 43.5 $\pm$ 3.68 | 46.4 $\pm$ 2.33 | 45.3 $\pm$ 1.63 | 41.5 $\pm$ 2.52 | 44.7 $\pm$ 2.83 | 46 $\pm$ 3.04   | 39.5 $\pm$ 1.69 | 46.1 $\pm$ 0.91 |
| 8C  | 20.7 $\pm$ 2.15 | 14.6 $\pm$ 2.62 | 16.4 $\pm$ 4.17 | 15.9 $\pm$ 0.99 | 10.5 $\pm$ 1.01 | 18.6 $\pm$ 1.44 | 13.7 $\pm$ 2.59 | 10.5 $\pm$ 0.85 | 20.7 $\pm$ 1.13 | 10.1 $\pm$ 2.29 |
| 16C | 9 $\pm$ 6.79    | 1.8 $\pm$ 0.15  | 3.1 $\pm$ 2.37  | 4 $\pm$ 0.91    | 1.6 $\pm$ 0.71  | 6.2 $\pm$ 1.14  | 3.9 $\pm$ 1.33  | 3.5 $\pm$ 0.88  | 3.9 $\pm$ 0.39  | 1 $\pm$ 0.31    |

#### 12 DAP

|     | HS584           | THm             | ZFm             | RPm             | NOm             | BGsm            | NOsx            | MHx             | MGx             | WQx             |
|-----|-----------------|-----------------|-----------------|-----------------|-----------------|-----------------|-----------------|-----------------|-----------------|-----------------|
| 2C  | 42.5 $\pm$ 1.83 | 30.7 $\pm$ 0.83 | 31.9 $\pm$ 1.6  | 35.6 $\pm$ 2.6  | 40.5 $\pm$ 3.44 | 37.1 $\pm$ 8.49 | 51 $\pm$ 6.94   | 51.4 $\pm$ 4.39 | 32.1 $\pm$ 2.38 | 36.4 $\pm$ 3    |
| 4C  | 34.1 $\pm$ 1.29 | 41.8 $\pm$ 0.75 | 36.9 $\pm$ 3.64 | 42.3 $\pm$ 2.48 | 37.2 $\pm$ 2.15 | 37.2 $\pm$ 5.77 | 33.2 $\pm$ 7.05 | 32.4 $\pm$ 1.98 | 38.3 $\pm$ 0.51 | 34.9 $\pm$ 2.16 |
| 8C  | 17.3 $\pm$ 1.15 | 20.4 $\pm$ 2.58 | 23.6 $\pm$ 2.31 | 16.5 $\pm$ 1.53 | 14 $\pm$ 2.46   | 19.2 $\pm$ 2.6  | 11.3 $\pm$ 0.35 | 10.2 $\pm$ 2.52 | 22.6 $\pm$ 2.15 | 18 $\pm$ 1.54   |
| 16C | 6.2 $\pm$ 0.84  | 7 $\pm$ 1.3     | 7.5 $\pm$ 1.64  | 5.5 $\pm$ 1.59  | 8.2 $\pm$ 1.25  | 6.5 $\pm$ 0.2   | 4.5 $\pm$ 1.01  | 6.1 $\pm$ 0.41  | 7 $\pm$ 0.66    | 10.6 $\pm$ 3.89 |

#### 16 DAP

|     | HS584           | THm             | ZFm             | RPm             | NOm             | BGsm             | NOsx            | MHx             | MGx             | WQx             |
|-----|-----------------|-----------------|-----------------|-----------------|-----------------|------------------|-----------------|-----------------|-----------------|-----------------|
| 2C  | 51 $\pm$ 0.19   | 38.5 $\pm$ 7.08 | 50.9 $\pm$ 2.39 | 45.8 $\pm$ 3.28 | 50.6 $\pm$ 1.61 | 51.8 $\pm$ 11.07 | 51.4 $\pm$ 7.86 | 51.9 $\pm$ 2.2  | 40.8 $\pm$ 5    | 45.8 $\pm$ 6.76 |
| 4C  | 30.4 $\pm$ 0.81 | 39 $\pm$ 5.62   | 27 $\pm$ 1      | 32 $\pm$ 1.55   | 32.3 $\pm$ 2.28 | 30.2 $\pm$ 4.87  | 31.3 $\pm$ 4.19 | 25.7 $\pm$ 2.1  | 28.4 $\pm$ 0.65 | 32 $\pm$ 7.04   |
| 8C  | 11.9 $\pm$ 0.71 | 16.1 $\pm$ 3.46 | 13.2 $\pm$ 1.72 | 14.7 $\pm$ 1.41 | 10.6 $\pm$ 1.93 | 11.8 $\pm$ 4.96  | 11.9 $\pm$ 2    | 11.2 $\pm$ 0.87 | 20.1 $\pm$ 3.51 | 14 $\pm$ 2.02   |
| 16C | 6.6 $\pm$ 0.2   | 6.3 $\pm$ 1.9   | 8.8 $\pm$ 0.94  | 7.5 $\pm$ 2.1   | 6.5 $\pm$ 1.73  | 6.2 $\pm$ 1.26   | 5.4 $\pm$ 8.23  | 11.2 $\pm$ 1    | 10.7 $\pm$ 1.79 | 8.2 $\pm$ 2.24  |

#### 20 DAP

|    | HS584           | THm            | ZFm             | RPm             | NOm             | BGsm            | NOsx            | MHx             | MGx             | WQx             |
|----|-----------------|----------------|-----------------|-----------------|-----------------|-----------------|-----------------|-----------------|-----------------|-----------------|
| 2C | 55.8 $\pm$ 1.21 | 47 $\pm$ 3.01  | 48.3 $\pm$ 6    | 49.3 $\pm$ 4.81 | 61.1 $\pm$ 2.3  | 54.3 $\pm$ 0.91 | 56.2 $\pm$ 3    | 61.5 $\pm$ 3.11 | 53.5 $\pm$ 3.16 | 46.1 $\pm$ 1.27 |
| 4C | 28.5 $\pm$ 2.07 | 35.5 $\pm$ 3.1 | 28.7 $\pm$ 0.56 | 29.1 $\pm$ 2.06 | 27.1 $\pm$ 2.27 | 27.9 $\pm$ 0.64 | 29.2 $\pm$ 1.14 | 23.9 $\pm$ 1.51 | 28 $\pm$ 0.99   | 25.9 $\pm$ 1.29 |

|     |            |            |            |            |           |            |           |           |            |            |
|-----|------------|------------|------------|------------|-----------|------------|-----------|-----------|------------|------------|
| 8C  | 10.4 ±0.85 | 11.6 ±0.69 | 12.4 ±2.25 | 13.1 ±3.14 | 7.4 ±0.9  | 11.7 ±0.53 | 9.7 ±1.21 | 8.9 ±1.44 | 12.6 ±1.57 | 14.5 ±1.49 |
| 16C | 5.3 ±0.47  | 6 ±0.93    | 10.5 ±4.35 | 8.5 ±1.87  | 4.4 ±0.66 | 6.1 ±0.79  | 4.9 ±0.66 | 5.8 ±0.61 | 5.9 ±0.93  | 13.5 ±0.96 |

## 24 DAP

|     | HS584      | THm        | ZFm        | RPm        | NOm        | BGsm       | NOsx       | MHx        | MGx        | WQx        |
|-----|------------|------------|------------|------------|------------|------------|------------|------------|------------|------------|
| 2C  | 53.2 ±1.52 | 47.9 ±3.04 | 49.3 ±3.86 | 51 ±1.41   | 60.8 ±4.82 | 51.2 ±2.23 | 57.3 ±1.72 | 57.1 ±3.94 | 48.4 ±4.82 | 47.8 ±1.41 |
| 4C  | 28.8 ±0.67 | 32.2 ±2.83 | 25.4 ±1.53 | 27.1 ±0.98 | 24.1 ±1.05 | 26.4 ±0.1  | 25.9 ±1.64 | 24.9 ±1.91 | 29.1 ±0.9  | 30.2 ±1.08 |
| 8C  | 12.3 ±0.73 | 12 ±1.57   | 13.8 ±1.41 | 14 ±0.73   | 9.8 ±2.91  | 14.5 ±1.43 | 11.3 ±1.15 | 11.2 ±0.94 | 15.1 ±3.48 | 15 ±0.71   |
| 16C | 5.7 ±0.39  | 7.9 ±2.21  | 11.6 ±3.12 | 7.9 ±1.5   | 5.3 ±1.03  | 7.9 ±0.76  | 5.5 ±1.99  | 6.8 ±1.33  | 7.3 ±1.98  | 7 ±1.03    |

## Dry

|     | HS584      | THm        | ZFm        | RPm        | NOm        | BGsm       | NOsx       | MHx        | MGx        | WQx        |
|-----|------------|------------|------------|------------|------------|------------|------------|------------|------------|------------|
| 2C  | 50 ±1.44   | 53.5 ±1.83 | 57 ±0.37   | 55.1 ±3.71 | 57.4 ±1.05 | 53.5 ±2.76 | 60.2 ±3.99 | 49.6 ±4.04 | 54.5 ±0.75 | 52.4 ±1.38 |
| 4C  | 28.4 ±0.97 | 28.3 ±1.15 | 28.2 ±0.75 | 28.7 ±1.27 | 28.9 ±1.32 | 27.4 ±2.23 | 27.6 ±1.34 | 29.7 ±2.32 | 28.4 ±0.57 | 27.8 ±0.79 |
| 8C  | 17 ±0.6    | 14.2 ±1.06 | 11.2 ±0.32 | 12.4 ±1.99 | 10.7 ±0.16 | 13.9 ±0.47 | 9.4 ±2.08  | 16.4 ±1.57 | 13.1 ±1    | 15.5 ±0.87 |
| 16C | 4.7 ±0.31  | 4 ±0.3     | 3.6 ±0.2   | 3.8 ±0.49  | 3 ±0.3     | 5.2 ±0.33  | 2.8 ±0.73  | 4.4 ±0.18  | 3.9 ±0.15  | 4.3 ±0.31  |

**Table S2.** Super cycle values at a given DAP calculated for SMTs. **Supports Figure 3b.** Values are the means from 3 biological replicates, each with at least 5 measurements (seeds) ± SD.

|        | HS584       | THm         | ZFm         | RPm         | NOm         | BGsm        | NOsx        | MHx         | MGx         | WQx         |
|--------|-------------|-------------|-------------|-------------|-------------|-------------|-------------|-------------|-------------|-------------|
| 4 DAP  | 0.08 ± 0.01 | 0.09 ± 0.01 | 0.08 ± 0.01 | 0.07 ± 0.02 | 0.08 ± 0.01 | 0.09 ± 0.01 | 0.06 ± 0.01 | 0.07 ± 0.01 | 0.07 ± 0.00 | 0.06 ± 0.00 |
| 6 DAP  | 0.11 ± 0.02 | 0.13 ± 0.01 | 0.12 ± 0.03 | 0.15 ± 0.07 | 0.17 ± 0.07 | 0.16 ± 0.01 | 0.1 ± 0.01  | 0.1 ± 0.01  | 0.09 ± 0.01 | 0.11 ± 0.01 |
| 8 DAP  | 0.25 ± 0.07 | 0.18 ± 0.03 | 0.22 ± 0.07 | 0.24 ± 0.02 | 0.14 ± 0.02 | 0.31 ± 0.02 | 0.19 ± 0.01 | 0.18 ± 0.05 | 0.29 ± 0.02 | 0.12 ± 0.03 |
| 12 DAP | 0.31 ± 0.04 | 0.35 ± 0.01 | 0.39 ± 0.03 | 0.28 ± 0.03 | 0.31 ± 0.01 | 0.32 ± 0.03 | 0.33 ± 0.03 | 0.22 ± 0.02 | 0.37 ± 0.03 | 0.39 ± 0.09 |
| 16 DAP | 0.25 ± 0.01 | 0.29 ± 0    | 0.31 ± 0.02 | 0.3 ± 0.06  | 0.24 ± 0.05 | 0.24 ± 0.03 | 0.32 ± 0.07 | 0.23 ± 0.01 | 0.42 ± 0.07 | 0.3 ± 0.03  |
| 20 DAP | 0.21 ± 0.02 | 0.24 ± 0.02 | 0.4 ± 0.01  | 0.3 ± 0.07  | 0.16 ± 0.02 | 0.25 ± 0.03 | 0.29 ± 0.01 | 0.2 ± 0.03  | 0.24 ± 0.03 | 0.42 ± 0.03 |
| 24 DAP | 0.24 ± 0.01 | 0.28 ± 0.03 | 0.37 ± 0.05 | 0.3 ± 0.04  | 0.2 ± 0.05  | 0.3 ± 0.04  | 0.28 ± 0.03 | 0.25 ± 0.05 | 0.3 ± 0.07  | 0.29 ± 0.03 |
| Dry    | 0.26 ± 0.01 | 0.22 ± 0.01 | 0.18 ± 0.01 | 0.2 ± 0.03  | 0.17 ± 0.01 | 0.24 ± 0.02 | 0.15 ± 0.01 | 0.25 ± 0.03 | 0.26 ± 0.02 | 0.24 ± 0.01 |

|        | mesic       | semi-mesic  | semi-xeric  | xeric       |
|--------|-------------|-------------|-------------|-------------|
| 4 DAP  | 0.08 ± 0.01 | 0.09 ± 0.01 | 0.06 ± 0.01 | 0.06 ± 0.01 |
| 6 DAP  | 0.14 ± 0.02 | 0.16 ± 0.01 | 0.1 ± 0.01  | 0.1 ± 0.01  |
| 8 DAP  | 0.19 ± 0.04 | 0.31 ± 0.02 | 0.19 ± 0.01 | 0.19 ± 0.08 |
| 12 DAP | 0.33 ± 0.05 | 0.32 ± 0.03 | 0.33 ± 0.03 | 0.33 ± 0.09 |
| 16 DAP | 0.28 ± 0.03 | 0.24 ± 0.03 | 0.32 ± 0.07 | 0.32 ± 0.09 |
| 20 DAP | 0.27 ± 0.1  | 0.25 ± 0.03 | 0.29 ± 0.01 | 0.29 ± 0.11 |
| 24 DAP | 0.29 ± 0.07 | 0.3 ± 0.04  | 0.28 ± 0.03 | 0.28 ± 0.03 |
| Dry    | 0.19 ± 0.02 | 0.24 ± 0.02 | 0.15 ± 0.01 | 0.25 ± 0.01 |



**Table S3.** Percentage of 3C, 6C, 12C and 24C nuclei at a given DAP and in dry seeds in endosperm **Supports Figure 4a.** Values are the means from 3 biological replicates, each with at least 5 measurements (seeds)  $\pm$  SD. Blue color = mesic; green color = semi-mesic; green-brown color = semi-xeric; orange color = xeric.

#### 4 DAP

|     | HS584           | THm            | ZFm             | RPm             | NOm              | BGsm            | NOsx            | MHx             | MGx             | WQx             |
|-----|-----------------|----------------|-----------------|-----------------|------------------|-----------------|-----------------|-----------------|-----------------|-----------------|
| 3C  | 58.9 $\pm$ 7.36 | 60 $\pm$ 6.66  | 62.4 $\pm$ 8.92 | 62.6 $\pm$ 4.73 | 51 $\pm$ 13.62   | 59.1 $\pm$ 1.25 | 59.3 $\pm$ 6.22 | 50.5 $\pm$ 1.36 | 80.2 $\pm$ 2.12 | 66.6 $\pm$ 1.87 |
| 6C  | 32.5 $\pm$ 6.96 | 32 $\pm$ 7.01  | 30.4 $\pm$ 9.12 | 29.6 $\pm$ 6.05 | 39.4 $\pm$ 14.71 | 31.5 $\pm$ 1.61 | 33.1 $\pm$ 6.04 | 40 $\pm$ 3.74   | 14.3 $\pm$ 1.21 | 27.2 $\pm$ 1.94 |
| 12C | 6.7 $\pm$ 0.86  | 6.4 $\pm$ 0.3  | 5.6 $\pm$ 1.05  | 6.1 $\pm$ 1.97  | 7.4 $\pm$ 0.42   | 7.4 $\pm$ 1.97  | 5.9 $\pm$ 0.54  | 7 $\pm$ 2.41    | 3.9 $\pm$ 0.64  | 4.8 $\pm$ 0.62  |
| 24C | 1.8 $\pm$ 0.19  | 1.4 $\pm$ 0.33 | 1.6 $\pm$ 0.46  | 1.6 $\pm$ 0.94  | 2.1 $\pm$ 0.6    | 1.9 $\pm$ 0.84  | 1.7 $\pm$ 0.15  | 2.4 $\pm$ 0.72  | 1.4 $\pm$ 0.22  | 1.2 $\pm$ 0.07  |

#### 6 DAP

|     | HS584           | THm             | ZFm             | RPm             | NOm             | BGsm            | NOsx            | MHx             | MGx             | WQx             |
|-----|-----------------|-----------------|-----------------|-----------------|-----------------|-----------------|-----------------|-----------------|-----------------|-----------------|
| 3C  | 50.9 $\pm$ 4.4  | 59.7 $\pm$ 3.1  | 55.3 $\pm$ 9.61 | 55.5 $\pm$ 7.19 | 56.1 $\pm$ 6.98 | 53.4 $\pm$ 0.61 | 61.6 $\pm$ 6.59 | 50.2 $\pm$ 5.67 | 75.3 $\pm$ 3.1  | 56.9 $\pm$ 1.12 |
| 6C  | 34 $\pm$ 3.47   | 34.1 $\pm$ 1.58 | 35.6 $\pm$ 6.87 | 33.7 $\pm$ 0.93 | 30.2 $\pm$ 2.91 | 36.1 $\pm$ 1.7  | 31.7 $\pm$ 6.31 | 40.4 $\pm$ 4.69 | 19.8 $\pm$ 3.25 | 35.1 $\pm$ 0.91 |
| 12C | 12.7 $\pm$ 6.18 | 5 $\pm$ 1.08    | 7.1 $\pm$ 2.18  | 8.8 $\pm$ 5.87  | 10.2 $\pm$ 6.14 | 9 $\pm$ 1.67    | 5.4 $\pm$ 0.95  | 7.6 $\pm$ 1.2   | 3.9 $\pm$ 0.32  | 6.6 $\pm$ 1.33  |
| 24C | 2.4 $\pm$ 1.71  | 1.1 $\pm$ 0.45  | 1.9 $\pm$ 0.73  | 1.9 $\pm$ 0.82  | 3.3 $\pm$ 3.29  | 1.5 $\pm$ 0.45  | 1.1 $\pm$ 0.02  | 1.6 $\pm$ 0.33  | 1 $\pm$ 0.21    | 1.3 $\pm$ 0.10  |

#### 8 DAP

|     | HS584           | THm             | ZFm             | RPm             | NOm             | BGsm            | NOsx            | MHx             | MGx             | WQx             |
|-----|-----------------|-----------------|-----------------|-----------------|-----------------|-----------------|-----------------|-----------------|-----------------|-----------------|
| 3C  | 48.3 $\pm$ 1.35 | 54.9 $\pm$ 2.7  | 49.8 $\pm$ 9.33 | 47.9 $\pm$ 3.15 | 56.2 $\pm$ 6.73 | 39.6 $\pm$ 1.55 | 52.2 $\pm$ 3.93 | 44.5 $\pm$ 3.35 | 47 $\pm$ 2.17   | 61.2 $\pm$ 1.19 |
| 6C  | 27.5 $\pm$ 3.79 | 35.2 $\pm$ 2.32 | 32.2 $\pm$ 1.79 | 34.5 $\pm$ 3.82 | 29.8 $\pm$ 2.82 | 30.3 $\pm$ 1.83 | 30 $\pm$ 3.09   | 30.5 $\pm$ 0.73 | 32.8 $\pm$ 1.38 | 33.2 $\pm$ 1.5  |
| 12C | 18.4 $\pm$ 0.45 | 8.1 $\pm$ 0.69  | 14.1 $\pm$ 6.61 | 15.1 $\pm$ 0.2  | 10 $\pm$ 3.09   | 23 $\pm$ 1.1    | 14.7 $\pm$ 3.08 | 17.9 $\pm$ 2.11 | 17.1 $\pm$ 2.09 | 4.6 $\pm$ 0.7   |
| 24C | 5.8 $\pm$ 2.12  | 1.7 $\pm$ 0.53  | 3.9 $\pm$ 3.49  | 2.3 $\pm$ 0.5   | 2.9 $\pm$ 1.9   | 7 $\pm$ 0.96    | 3.1 $\pm$ 3.79  | 7 $\pm$ 1.08    | 3 $\pm$ 0.48    | 0.9 $\pm$ 0.2   |

#### 12 DAP

|     | HS584           | THm             | ZFm             | RPm             | NOm             | BGsm            | NOsx            | MHx             | MGx              | WQx             |
|-----|-----------------|-----------------|-----------------|-----------------|-----------------|-----------------|-----------------|-----------------|------------------|-----------------|
| 3C  | 27.1 $\pm$ 5.35 | 33.2 $\pm$ 7.78 | 35.8 $\pm$ 6.77 | 44.4 $\pm$ 4.04 | 35.8 $\pm$ 0.82 | 37.4 $\pm$ 7.42 | 33.4 $\pm$ 2.99 | 22 $\pm$ 4.27   | 40.5 $\pm$ 10.28 | 26.5 $\pm$ 6.08 |
| 6C  | 34.3 $\pm$ 2.63 | 34.5 $\pm$ 1.69 | 32.3 $\pm$ 0.99 | 32 $\pm$ 1.79   | 31.1 $\pm$ 0.94 | 29.9 $\pm$ 0.36 | 31 $\pm$ 1.19   | 30.3 $\pm$ 0.76 | 31.4 $\pm$ 3.61  | 39.4 $\pm$ 1.62 |
| 12C | 26.4 $\pm$ 3.4  | 24.3 $\pm$ 4.63 | 22.2 $\pm$ 3.28 | 19 $\pm$ 2.11   | 24.3 $\pm$ 1.21 | 21.1 $\pm$ 4.64 | 25.2 $\pm$ 1.38 | 29.1 $\pm$ 0.79 | 21.3 $\pm$ 5.9   | 28.6 $\pm$ 3.76 |
| 24C | 11.9 $\pm$ 0.55 | 7.9 $\pm$ 1.51  | 9.5 $\pm$ 3.92  | 4.5 $\pm$ 1.98  | 8.7 $\pm$ 0.49  | 11.2 $\pm$ 2.57 | 10.3 $\pm$ 0.71 | 18.3 $\pm$ 4.08 | 6.6 $\pm$ 1.22   | 5.4 $\pm$ 0.79  |

#### 16 DAP

|     | HS584           | THm             | ZFm             | RPm             | NOm             | BGsm            | NOsx            | MHx             | MGx             | WQx              |
|-----|-----------------|-----------------|-----------------|-----------------|-----------------|-----------------|-----------------|-----------------|-----------------|------------------|
| 3C  | 25.7 $\pm$ 1.98 | 35 $\pm$ 15.36  | 18.4 $\pm$ 1.84 | 22.9 $\pm$ 1.69 | 27.1 $\pm$ 1.89 | 22.5 $\pm$ 5.45 | 28.8 $\pm$ 2.09 | 21.1 $\pm$ 2.3  | 17.4 $\pm$ 2.77 | 30.9 $\pm$ 12.86 |
| 6C  | 34.1 $\pm$ 0.65 | 33.5 $\pm$ 3.36 | 33.2 $\pm$ 3.11 | 42.5 $\pm$ 1.46 | 30.9 $\pm$ 1.56 | 32.1 $\pm$ 1.31 | 30.1 $\pm$ 4.78 | 25.2 $\pm$ 2.83 | 37.3 $\pm$ 1.06 | 36.6 $\pm$ 1.9   |
| 12C | 29.1 $\pm$ 1.58 | 23.3 $\pm$ 8.89 | 34.4 $\pm$ 1.76 | 28.4 $\pm$ 1.38 | 29.8 $\pm$ 0.22 | 32.9 $\pm$ 3.56 | 28 $\pm$ 4.29   | 29.6 $\pm$ 0.79 | 29.8 $\pm$ 1.83 | 26.1 $\pm$ 7.69  |
| 24C | 10.8 $\pm$ 2.74 | 7.7 $\pm$ 4.07  | 13.6 $\pm$ 2.77 | 6.2 $\pm$ 1.57  | 11.8 $\pm$ 0.51 | 12.3 $\pm$ 0.61 | 12.9 $\pm$ 6.16 | 23.5 $\pm$ 5.29 | 15 $\pm$ 1.98   | 6.3 $\pm$ 3.33   |

#### 20 DAP

|     | HS584           | THm             | ZFm             | RPm             | NOm             | BGsm            | NOsx            | MHx             | MGx             | WQx             |
|-----|-----------------|-----------------|-----------------|-----------------|-----------------|-----------------|-----------------|-----------------|-----------------|-----------------|
| 3C  | 29 $\pm$ 3.01   | 27.8 $\pm$ 2.04 | 21.4 $\pm$ 2.05 | 22.7 $\pm$ 3.27 | 26.8 $\pm$ 3.3  | 24.1 $\pm$ 1    | 26.6 $\pm$ 2.94 | 24.2 $\pm$ 3.17 | 21.4 $\pm$ 2.54 | 17.6 $\pm$ 1.29 |
| 6C  | 37.6 $\pm$ 2.43 | 36.1 $\pm$ 0.67 | 33.7 $\pm$ 0.94 | 38.7 $\pm$ 0.42 | 29.4 $\pm$ 2.13 | 30.4 $\pm$ 1.78 | 32.7 $\pm$ 1.3  | 31 $\pm$ 1.64   | 32 $\pm$ 0.64   | 31.2 $\pm$ 2.66 |
| 12C | 25.5 $\pm$ 1.6  | 26.3 $\pm$ 2.67 | 30.9 $\pm$ 1    | 31 $\pm$ 2.39   | 32.2 $\pm$ 2.36 | 31.9 $\pm$ 0.17 | 30.7 $\pm$ 2.39 | 26.9 $\pm$ 7.75 | 33.9 $\pm$ 2.28 | 36.6 $\pm$ 1.9  |
| 24C | 7.7 $\pm$ 1.03  | 9.5 $\pm$ 1.55  | 13.4 $\pm$ 1.46 | 7.5 $\pm$ 1.5   | 11.4 $\pm$ 1.13 | 13.2 $\pm$ 2.95 | 9.9 $\pm$ 3.26  | 17.7 $\pm$ 3.01 | 12.3 $\pm$ 0.89 | 14.1 $\pm$ 2.19 |

## 24 DAP

|     | HS584      | THm        | ZFm        | RPm        | NOm        | BGsm       | NOsx       | MHx        | MGx        | WQx        |
|-----|------------|------------|------------|------------|------------|------------|------------|------------|------------|------------|
| 3C  | 26.2 ±0.58 | 26.9 ±1.4  | 25.7 ±3.01 | 22.7 ±1.53 | 28.2 ±2.34 | 22.8 ±2.1  | 30.1 ±2.19 | 31.9 ±2.54 | 20 ±2.04   | 23.8 ±2.11 |
| 6C  | 34.2 ±0.71 | 33.8 ±1.8  | 29.1 ±2.47 | 38 ±3.95   | 29.4 ±2.79 | 30.7 ±1.82 | 30.8 ±2.65 | 33 ±0.28   | 32 ±1.82   | 35.2 ±3.26 |
| 12C | 29.1 ±0.98 | 31.2 ±1.12 | 28.9 ±1.74 | 31.8 ±2.43 | 30.7 ±1.87 | 32.7 ±1.65 | 28.7 ±2.55 | 23 ±5.92   | 34.6 ±0.46 | 31 ±2.2    |
| 24C | 10.5 ±0.9  | 8 ±1.61    | 15.8 ±2.84 | 7.4 ±3.42  | 11.6 ±1.72 | 13.6 ±1.43 | 10.3 ±0.78 | 11.8 ±3.46 | 13.1 ±4.03 | 9.7 ±3.22  |

## Dry

|     | HS584      | THm        | ZFm        | RPm        | NOm        | BGsm       | NOsx       | MHx        | MGx        | WQx        |
|-----|------------|------------|------------|------------|------------|------------|------------|------------|------------|------------|
| 3C  | 31.1 ±1.13 | 37.2 ±2.29 | 38.7 ±1.81 | 39.5 ±1.31 | 46.8 ±1.38 | 38.1 ±2.27 | 44.9 ±1.53 | 28.9 ±3.77 | 38.2 ±2.25 | 37 ±1.37   |
| 6C  | 51.8 ±2.33 | 47.2 ±2.5  | 41.2 ±1.7  | 45.8 ±3.2  | 39.5 ±2.09 | 39.5 ±4.21 | 36.8 ±2.36 | 57 ±2.08   | 44.9 ±1.03 | 46.5 ±1.96 |
| 12C | 12.5 ±0.82 | 12 ±0.24   | 15.1 ±0.88 | 11.3 ±1.46 | 10.5 ±0.29 | 15.5 ±2.27 | 13.4 ±1.64 | 11.4 ±1.35 | 12.7 ±3.26 | 12.3 ±0.81 |
| 24C | 4.2 ±1.65  | 3.5 ±0.2   | 4.8 ±0.51  | 3.3 ±0.46  | 3.1 ±0.52  | 6.6 ±0.4   | 4.5 ±0.53  | 2.6 ±0.49  | 4.1 ±3.07  | 4 ±0.15    |

**Table S4.** Super cycle values at a given DAP calculated for endosperm. **Supports Figure 4b.** Values are the means from 3 biological replicates, each with at least 5 measurements (seeds) ± SD.

|        | HS584       | THm         | ZFm         | RPm         | NOm         | BGsm        | NOsx        | MHx         | MGx         | WQx         |
|--------|-------------|-------------|-------------|-------------|-------------|-------------|-------------|-------------|-------------|-------------|
| 4 DAP  | 0.16 ± 0.04 | 0.1 ± 0.01  | 0.09 ± 0.02 | 0.09 ± 0.04 | 0.12 ± 0.02 | 0.12 ± 0.04 | 0.09 ± 0.04 | 0.11 ± 0.01 | 0.07 ± 0.01 | 0.08 ± 0.01 |
| 6 DAP  | 0.11 ± 0.01 | 0.07 ± 0.02 | 0.11 ± 0.03 | 0.13 ± 0.07 | 0.1 ± 0     | 0.12 ± 0.01 | 0.08 ± 0.03 | 0.11 ± 0.01 | 0.06 ± 0.01 | 0.1 ± 0.01  |
| 8 DAP  | 0.18 ± 0.08 | 0.12 ± 0.01 | 0.22 ± 0.11 | 0.2 ± 0.01  | 0.19 ± 0.1  | 0.38 ± 0.04 | 0.2 ± 0.02  | 0.32 ± 0.11 | 0.23 ± 0.03 | 0.07 ± 0.01 |
| 12 DAP | 0.3 ± 0.04  | 0.4 ± 0.08  | 0.42 ± 0.11 | 0.28 ± 0.06 | 0.42 ± 0.02 | 0.45 ± 0.08 | 0.46 ± 0.1  | 0.67 ± 0.02 | 0.35 ± 0.08 | 0.4 ± 0.05  |
| 16 DAP | 0.53 ± 0.05 | 0.5 ± 0.03  | 0.63 ± 0.07 | 0.41 ± 0.03 | 0.55 ± 0.01 | 0.58 ± 0.1  | 0.54 ± 0.05 | 0.78 ± 0.1  | 0.61 ± 0.04 | 0.47 ± 0.02 |
| 20 DAP | 0.42 ± 0.02 | 0.46 ± 0.03 | 0.59 ± 0.04 | 0.47 ± 0.05 | 0.55 ± 0.04 | 0.6 ± 0.02  | 0.51 ± 0.06 | 0.63 ± 0.06 | 0.6 ± 0.03  | 0.66 ± 0.04 |
| 24 DAP | 0.5 ± 0.01  | 0.48 ± 0.03 | 0.62 ± 0.07 | 0.47 ± 0.09 | 0.54 ± 0.03 | 0.6 ± 0.02  | 0.5 ± 0.04  | 0.47 ± 0.01 | 0.61 ± 0.08 | 0.51 ± 0.05 |
| Dry    | 0.22 ± 0.04 | 0.19 ± 0    | 0.18 ± 0.02 | 0.18 ± 0.02 | 0.17 ± 0.01 | 0.3 ± 0.02  | 0.19 ± 0.02 | 0.17 ± 0.03 | 0.22 ± 0.04 | 0.21 ± 0    |

|        | mesic       | semi-mesic  | semi-xeric  | xeric       |
|--------|-------------|-------------|-------------|-------------|
| 4 DAP  | 0.1 ± 0.01  | 0.12 ± 0.01 | 0.09 ± 0.01 | 0.09 ± 0.02 |
| 6 DAP  | 0.1 ± 0.02  | 0.12 ± 0.01 | 0.08 ± 0.01 | 0.09 ± 0.03 |
| 8 DAP  | 0.18 ± 0.04 | 0.38 ± 0.02 | 0.2 ± 0.01  | 0.21 ± 0.13 |
| 12 DAP | 0.38 ± 0.07 | 0.45 ± 0.03 | 0.46 ± 0.03 | 0.47 ± 0.17 |
| 16 DAP | 0.52 ± 0.09 | 0.58 ± 0.03 | 0.54 ± 0.07 | 0.62 ± 0.15 |
| 20 DAP | 0.52 ± 0.06 | 0.6 ± 0.03  | 0.51 ± 0.01 | 0.63 ± 0.03 |
| 24 DAP | 0.53 ± 0.07 | 0.6 ± 0.04  | 0.5 ± 0.03  | 0.53 ± 0.07 |
| Dry    | 0.18 ± 0.01 | 0.3 ± 0.02  | 0.19 ± 0.01 | 0.2 ± 0.03  |

**Table S5.** Super cycle values at a given DAP calculated for embryo/seed maternal tissues (EMB+SMTs) and endosperm (END). Data are the means (±SD) from three biological replicates, each with at least 5 individual measurements. **Supports Figure 5a.**

| EMB + SMTs | Wild        | Cultivated  | END   | Wild       | Cultivated  |
|------------|-------------|-------------|-------|------------|-------------|
| 4 DAP      | 0.07 ± 0.01 | 0.11 ± 0.03 | 4 DAP | 0.1 ± 0.02 | 0.11 ± 0.02 |
| 6 DAP      | 0.12 ± 0.03 | 0.2 ± 0.04  | 6 DAP | 0.1 ± 0.02 | 0.14 ± 0.05 |

---

|        |                 |                 |        |                 |                 |
|--------|-----------------|-----------------|--------|-----------------|-----------------|
| 8 DAP  | $0.21 \pm 0.06$ | $0.29 \pm 0.05$ | 8 DAP  | $0.21 \pm 0.09$ | $0.26 \pm 0.08$ |
| 12 DAP | $0.33 \pm 0.05$ | $0.32 \pm 0.06$ | 12 DAP | $0.41 \pm 0.11$ | $0.39 \pm 0.11$ |
| 16 DAP | $0.29 \pm 0.06$ | $0.26 \pm 0.04$ | 16 DAP | $0.56 \pm 0.1$  | $0.46 \pm 0.13$ |
| 20 DAP | $0.27 \pm 0.08$ | $0.21 \pm 0.04$ | 20 DAP | $0.55 \pm 0.08$ | $0.43 \pm 0.1$  |
| 24 DAP | $0.28 \pm 0.04$ | $0.18 \pm 0.03$ | 24 DAP | $0.53 \pm 0.06$ | $0.36 \pm 0.07$ |
| Dry    | $0.22 \pm 0.04$ | $0.17 \pm 0.03$ | Dry    | $0.2 \pm 0.04$  | $0.19 \pm 0.02$ |

---
